# Supplementary material for: Development of the CMA-GFS-AERO 4D-Var assimilation system v1.0 – Part 1: System description and preliminary experimental results
Source: Copernicus journal article supplement (doi:10.5194/gmd-18-4855-2025), 2025-08-08
Supplement: Supplementary file 1 [file gmd-18-4855-2025-supplement.pdf]

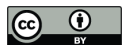

*Supplement of*

**Development of the CMA-GFS-AERO 4D-Var assimilation system  
v1.0 – Part 1: System description and  
preliminary experimental results**

**Yongzhu Liu et al.**

*Correspondence to:* Xiaoye Zhang (xiaoye@cma.gov.cn) and Xueshun Shen (shenxs@cma.gov.cn)

The copyright of individual parts of the supplement might differ from the article licence.

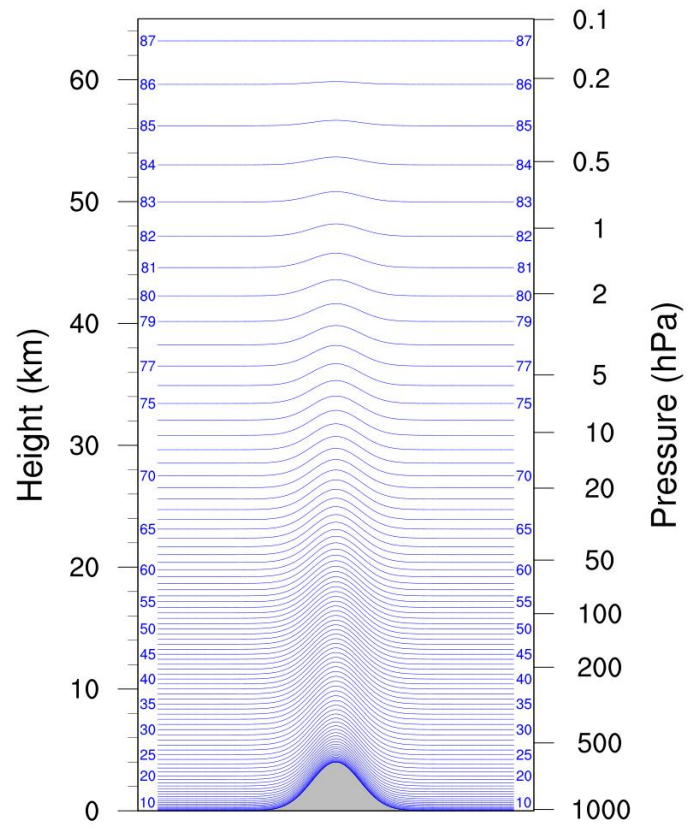

Figure S1. Correspondence between the model layer and the altitude in CMA-GFS.

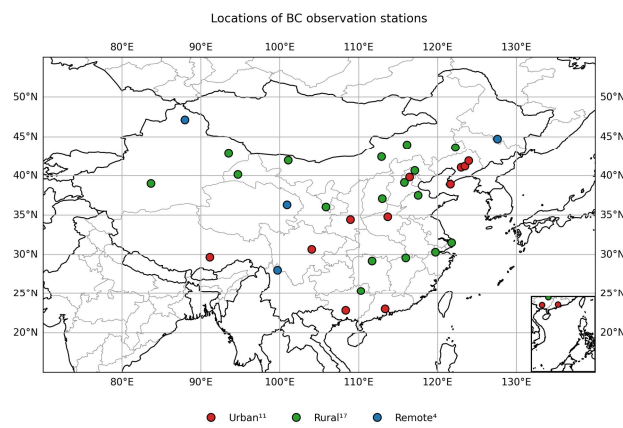

Figure S2. Distribution of BC surface observation stations.

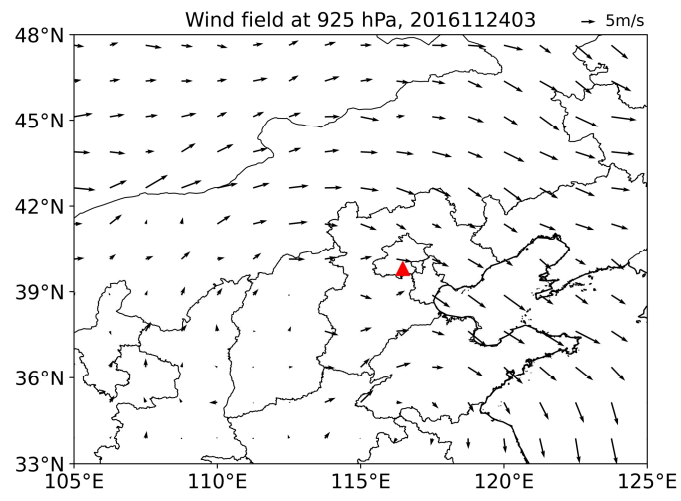

Figure S3. The wind field at 925hPa in the single-point observation experiment, and the red triangle represents the ideal observation location (116.47°E, 39.8°N).

Table S1. The atmospheric observation data used in the CMA-GFS-AERO 4D-Var experiment.

| Observation type          | Observation element                      |
|---------------------------|------------------------------------------|
| TEMP                      | Temperature, wind, and relative humidity |
| SYNOP                     | Air pressure                             |
| SHIP                      | Air pressure                             |
| AIREP                     | Wind                                     |
| SATOB                     | Wind                                     |
| SCATWIND                  | Wind                                     |
| GNSSRO                    | Refractivity                             |
| NOAA15 AMSU-A             | Radiance                                 |
| NOAA18 AMSU-A and AMSU-B  | Radiance                                 |
| NOAA19 AMSU-A and AMSU-B  | Radiance                                 |
| METOP-A AMSU-A and AMSU-B | Radiance                                 |
| METOP-B AMSU-A and AMSU-B | Radiance                                 |
| NPP ATMS AMSU-A           | Radiance                                 |
